# Supplementary material for: Unveiling unconventional magnetism at the surface of Sr2RuO4
Source: PubMed Central journal article supplement (PMC8490454; doi:10.1038/s41467-021-26020-5), 2021-10-04
Supplement: 41467_2021_26020_MOESM1_ESM.pdf [file 41467_2021_26020_MOESM1_ESM.pdf]

1 **Supplementary Information for**

2  
3 **Unveiling unconventional magnetism**  
4 **at the surface of Sr<sub>2</sub>RuO<sub>4</sub>**

5  
6 **R. Fittipaldi<sup>1,2,†</sup>, R. Hartmann<sup>3,†</sup>, M. T. Mercaldo<sup>2</sup>, S. Komori<sup>4,c</sup>, A. Bjørlig<sup>5</sup>, W. Kyung<sup>6</sup>, Y. Yasui<sup>7,b</sup>,**  
7 **T. Miyoshi<sup>7</sup>, L. A. B. Olde Olthof<sup>4</sup>, C. M. Palomares Garcia<sup>4</sup>, V. Granata<sup>2</sup>, I. Keren<sup>8,a</sup>, W. Higemoto<sup>9</sup>,**  
8 **A. Suter<sup>8</sup>, T. Prokscha<sup>8</sup>, A. Romano<sup>1,2</sup>, C. Noce<sup>2</sup>, C. Kim<sup>6</sup>, Y. Maeno<sup>7</sup>, E. Scheer<sup>3</sup>, B. Kalisky<sup>5</sup>, J. W.**  
9 **A. Robinson<sup>4</sup>, M. Cuoco<sup>1,2,\*</sup>, Z. Salman<sup>8,\*</sup>, A. Vecchione<sup>1,2</sup>, A. Di Bernardo<sup>3,\*</sup>**

10  
11 <sup>1</sup> *CNR-SPIN, c/o University of Salerno, I-84084 Fisciano, Salerno, Italy*

12 <sup>2</sup> *Dipartimento di Fisica “E.R. Caianiello”, University of Salerno, I-84084 Fisciano, Salerno, Italy*

13 <sup>3</sup> *Department of Physics, University of Konstanz, 78457 Konstanz, Germany*

14 <sup>4</sup> *Department of Materials Science and Metallurgy, University of Cambridge, Cambridge, CB3 0FS, UK*

15 <sup>5</sup> *Department of Physics, Bar Ilan University, Ramat Gan, 5920002, Israel*

16 <sup>6</sup> *Department of Physics and Astronomy, Seoul National University, Seoul, 08826, Korea*

17 <sup>7</sup> *Department of Physics, Kyoto University, Kyoto 606-8502, Japan*

18 <sup>8</sup> *Laboratory for Muon Spin Spectroscopy, Paul Scherrer Institute, CH-5232 Villigen PSI, Switzerland*

19 <sup>9</sup> *Advanced Science Research Center, Japan Atomic Energy Agency, Tokai, Ibaraki 319-1195, Japan*

20  
21 <sup>†</sup> *equally contributed to the work*

22 <sup>a</sup> *current address: The Racah Institute of Physics, The Hebrew University of Jerusalem, Jerusalem 91904,*  
23 *Israel*

24 <sup>b</sup> *current address: RIKEN, Centre for Emergent Matter Science, Saitama 351-0198, Japan*

25 <sup>c</sup> *current address: Department of Physics, Nagoya University, Nagoya 464-8602, Japan*

26  
27 *\*correspondence to: Mario Cuoco ([mario.cuoco@spin.cnr.it](mailto:mario.cuoco@spin.cnr.it)), Zaher Salman ([zaher.salman@psi.ch](mailto:zaher.salman@psi.ch)) and*  
28 *Angelo Di Bernardo ([angelo.dibernardo@uni-konstanz.de](mailto:angelo.dibernardo@uni-konstanz.de))*

29  
30  
31 **This file includes:**

32 - Supplementary Figures 1-10

33 - Supplementary Text with further details about muon data analysis and numerical model for orbital loop  
34 current phase in Sr<sub>2</sub>RuO<sub>4</sub>

35

36 **Supplementary Figures**

37

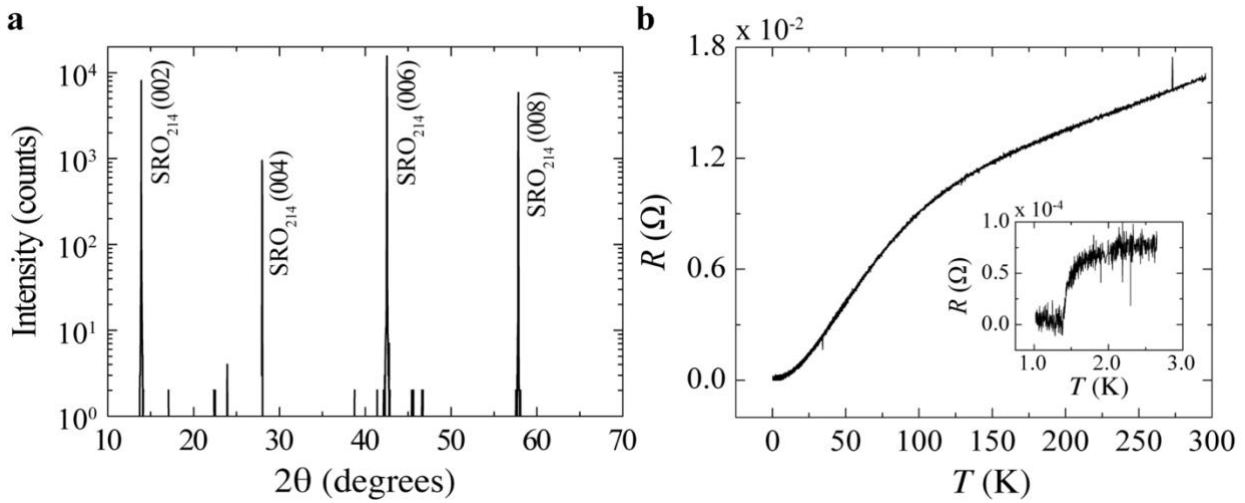

38

39

40

41

42

43

44

45

**Supplementary Figure 1: Structural and electronic transport properties of SRO<sub>214</sub>.** **a**, High-angle X-ray diffraction pattern on a SRO<sub>214</sub> single crystal showing absence of impurity peaks. **b**, Resistance versus temperature curve for a SRO<sub>214</sub> single crystal measured with current-biased setup in a four-point measurement configuration showing a residual resistance ratio larger than 200 and a superconducting critical temperature  $T_c$  of  $\sim 1.45$  K (see inset).

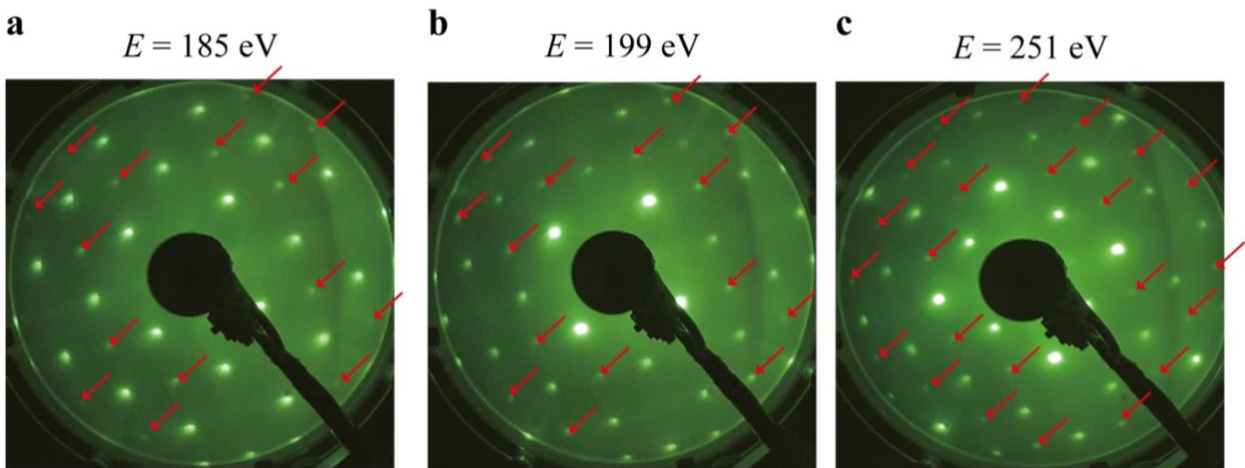

46

47

48

49

50

**Supplementary Figure 2: Distortion of the RuO<sub>6</sub> octahedra at the SRO<sub>214</sub> surface.** **a-c**, Low-energy electron diffraction (LEED) pattern acquired on SRO<sub>214</sub> single crystals at three different energies,  $E = 185$  eV (**a**),  $E = 199$  eV (**b**) and  $E = 251$  eV (**c**) and showing fractional spots (marked by red arrows) which correspond to the distortion of the surface RuO<sub>6</sub> octahedra.

51

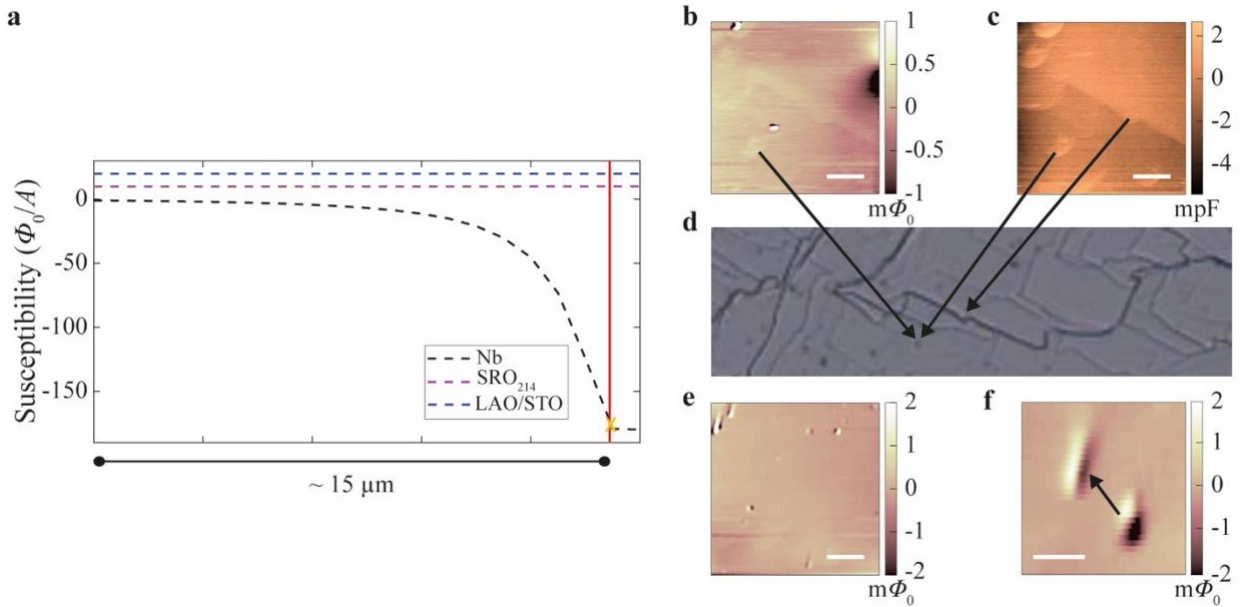

52  
 53 **Supplementary Figure 3: Scanning SQUID measurements of SRO<sub>214</sub>.** **a**, Magnetic susceptibility  
 54 measured at  $T = 4.2$  K of the SRO<sub>214</sub> single crystals used for the low energy  $\mu$ SR experiment as a function  
 55 of SQUID-to-sample distance (bottom axis). The amplitude of the signal measured on SRO<sub>214</sub> (purple  
 56 dashed curve) is comparable to that measured on LaAlO<sub>3</sub>/SrTiO<sub>3</sub> (blue dashed curve) and about 15000  
 57 times smaller in modulus than the (diamagnetic) signal measured on a Nb thin film (black dashed curve).  
 58 We note that all curves begin at 0 magnetic susceptibility but have been offset for clarity. **b-d**, Magnetic  
 59 signal (**b**) and topography (**c**) images recorded on the surface of a SRO<sub>214</sub> single crystals (**d**) along step  
 60 edges (in the regions indicated by black arrows in (**d**)). The scale bars in (**b**) and (**c**) correspond to a length  
 61 of 50  $\mu$ m. The topography of the SRO<sub>214</sub> sample combined with the variation in sample-to-SQUID distance  
 62 can account for the weak signal observed along the sample edges in (**b**). Pillars on the sample – which also  
 63 induce a variation in the height of the SQUID – give rise to a magnetic signal similar to that generated by  
 64 edges. **e, f**, Direct current (DC) magnetic map on SRO<sub>214</sub> showing the absence of any magnetism, except  
 65 for small spots, most likely extrinsic to the sample and possibly introduced during the cleaving process.  
 66 These objects can be dragged over the surface (**f**). The scale bars in (**e**) and (**f**) correspond to a length of  
 67 50  $\mu$ m and 10  $\mu$ m, respectively. The magnetic flux maps in (**b**), (**e**) and (**f**) are shown in units of  $m\Phi_0$   
 68 ( $\Phi_0 = 2.0678 \times 10^{-15}$  Tesla  $\text{m}^2$  being the flux quantum).

69  
 70

71 **Supplementary Text**

72 **Further details about the analysis of the low energy  $\mu$ SR data**

73 The experimental setup and corresponding configurations (i.e., transverse, longitudinal and zero  
74 field) used to collect the LE- $\mu$ SR data on SRO<sub>214</sub> are shown in Fig. 1b, c and explained in the main  
75 text of the manuscript.

76 The starting point for the analysis of the muon data, independently on the configuration used,  
77 is the signal called asymmetry  $A_s(t)$ , which is experimentally determined from Eqs. S1 and S2  
78 below. The number of events  $N(t, E)$  is counted at a given time  $t$  and energy  $E$  by each of the eight  
79 positron detectors (i.e., top, bottom, left and right, each consisting of an upstream and a  
80 downstream segment) arranged around the SRO<sub>214</sub> sample, as shown in Fig. 1b of the main  
81 manuscript. The number of events recorded by each detector can be written as

$$N^i(t) = N_0^i e^{-t/\tau_\mu} [1 + A_0 \mathbf{P}(t) \cdot \hat{\mathbf{n}}_i] + N_{\text{Bg}}^i, \quad (\text{Eq. S1})$$

82  
83  
84 where the index  $i$  refers to a specific detector segment ( $i = 1, 2, \dots, 8$ ) and  $N_0^i$  and  $N_{\text{Bg}}^i$  are the  
85 number of counts at the initial time  $t = 0$  and the number of background counts for the same  
86 detector  $i$ . In addition, in Eq. S1,  $A_0$  is the asymmetry parameter which depends on the beta-decay  
87 symmetry of the muons and on the solid angle formed by the detector segments,  $\mathbf{P}(t)$  is the muons'  
88 polarisation, which corresponds to the ensemble average polarization of all muons implanted at  
89 an energy  $E$  with initial polarization  $\mathbf{S}_{\mu^+}$  and  $\hat{\mathbf{n}}_i$  is the unit vector along the direction between the  
90 sample and the  $i^{\text{th}}$  segment of detectors as shown in Supplementary Fig. 4.

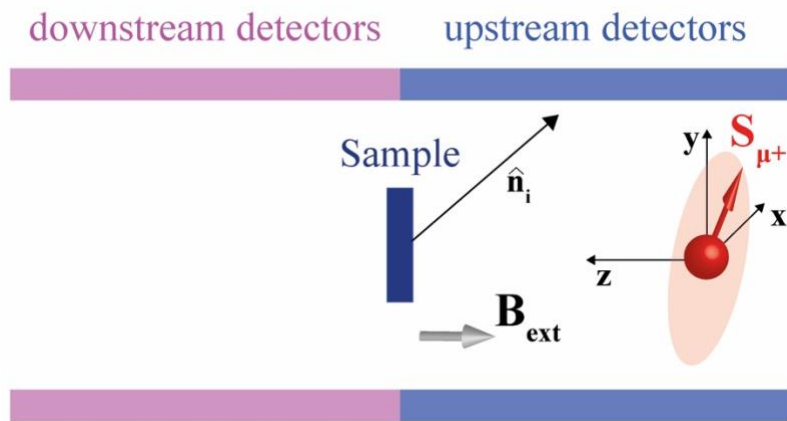

91  
92 **Supplementary Figure 4: Positron detector segment.** Schematic showing the arrangement of the  
93 investigated sample with respect to one of the detector segments in the low energy  $\mu$ SR measurement  
94 apparatus. The number of counts of the detector segment (upstream or downstream) depends on the  
95 projection of the muons' spin polarization along the unit vector  $\hat{\mathbf{n}}_i$ , as described by Eq. S1. The direction  
96 of the applied field and the precession plane of the muons refer to the TF configuration used here as an  
97 example, but the detector setup is valid independently on the measurement configuration used.

98 (Eq. S1) also implies that the sum of positron counts of all the upstream or downstream  
 99 detectors gives information about the projection of  $\mathbf{P}(t)$  along the axis  $\mathbf{z}$ , whilst the sum of the  
 100 positron counts of the upstream and downstream segments of either the top or the bottom or the  
 101 left or the right detectors provides information about the projection of  $\mathbf{P}(t)$  in the  $xy$ -plane (see  
 102 Fig. 1b of the main manuscript).

103 In a transverse field (TF) configuration, we measure the projection  $\mathbf{P}(t)$  in the  $xy$ -plane,  $P_{xy}(t)$ ,  
 104 whereas in a longitudinal field (LF) configuration, we determine the projection of  $\mathbf{S}_{\mu^+}(t)$  along the  
 105 direction of the applied external field  $\mathbf{B}_{\text{ext}}$  ( $z$ -axis in Fig. 1b), i.e.,  $P_z(t)$ . For zero field (ZF)  
 106 measurements, we measure  $\mathbf{P}(t)$  along the initial muon's spin direction, i.e., left/right in the TF  
 107 geometry and upwards/downwards in the LF geometry.

108 In any measurement configuration, the asymmetry  $A_s(t, E)$  is weighted average of the muons'  
 109 spin polarization  $P_l(t)$  component, which is determined in that specific configuration, times the  
 110 muons' stopping depth profile  $n_\mu(E, z)$  meaning

$$A_s(t, E) = A_0 \int_0^\infty n_\mu(E, z) P_l(t) dz, \quad (\text{Eq. S2})$$

112 where  $l = z$  or  $l = xy$  depending on the setup used.  
 113

### 115 **Analysis of transverse field (TF) measurements**

116 In TF, the muons are implanted with the initial spin polarization  $\mathbf{S}_{\mu^+}$  in the  $xy$ -plane (nominally  
 117 along the  $y$ -axis) as shown in Fig. 1b of the main paper, and therefore precess in the plane  
 118 perpendicular to the external applied field  $\mathbf{B}_{\text{ext}}$ . The time evolution of  $\mathbf{P}(t)$  as the muons are  
 119 implanted inside the sample provides information about the local field amplitude  $B_{\text{loc}}$  in the  
 120 sample, which adds to the external field amplitude  $B_{\text{ext}}$ , and about the width of the local field  
 121 distribution. Both  $B_{\text{loc}}$  and the width of the distribution are averaged over the muons' stopping  
 122 depth because of the finite width of the muons' implantation profiles  $n_\mu(E, z)$ .

123 The  $A_s(t, E)$  signal determined in TF at a given  $E$  best fits to an exponentially damped oscillation  
 124 according to the relation

$$A_s(t) = A_0 e^{-\lambda t} \cos [\gamma_\mu B_{\text{loc}} t + \varphi_0] \quad (\text{Eq. S3})$$

126 where  $\lambda$  is the muon spin depolarization rate, which is proportional to the width of the local field  
 127 distribution, and  $\varphi_0$  is the initial muon phase which depends on the muons' initial spin direction  
 128 and on the detectors geometry. From the fitting of the experimental  $A_s(t, E)$  measured at a given  $E$   
 129

130 to the expression described by (Eq. S3), we determine  $B_{\text{loc}}$  and  $\lambda$  (averaged over the muon  
 131 implantation distribution depth), as well as  $\varphi_0$  and  $A_0$  for each  $E$  value.

132 Examples of  $A_s(t, E)$  measured from the positron counts of one detector according to Eq. S1  
 133 and corresponding fits to Eq. S3 are shown in Supplementary Fig. 5a. From the fit, we obtain the  
 134  $\lambda$  value in Eq. S3, which is related to the time decay of  $A_s(t, E)$  as explained above. The Fourier  
 135 transform of  $A_s(t, E)$  is proportional to the local field  $p(B_{\text{loc}})$  probability distribution, whose mean  
 136 value corresponds to the local field  $B_{\text{loc}}$  probed by muons averaged over their implantation depth  
 137 range at a given  $E$ . The raw data for  $A_s(t, E)$  and  $p(B_{\text{loc}})$  in Supplementary Fig. 5a, b and  
 138 corresponding theoretical fits are used to determine some of the data points shown in Fig. 2 and  
 139 Fig. 3c of the main text.

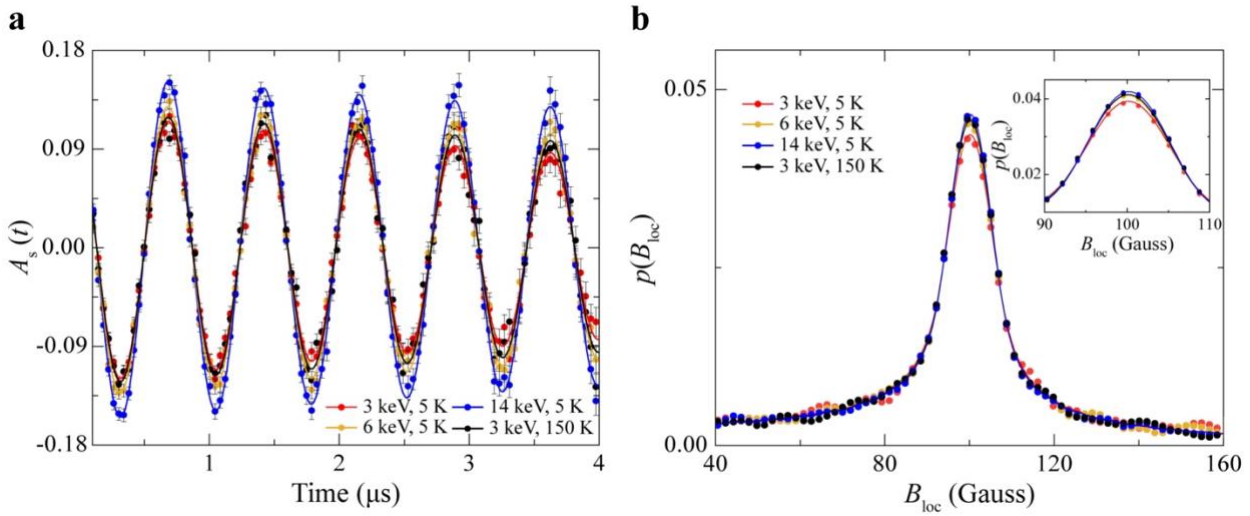

140 **Supplementary Figure 5: Asymmetry signal and corresponding local field distribution. a, b,**  
 141 **Examples of raw data (symbols with error bars) and theoretical fits (solid lines) for the asymmetry signal**  
 142  **$A_s(t)$  measured in SRO<sub>214</sub> and corresponding local field probability distribution  $p(B_{\text{loc}})$  determined from**  
 143  **$A_s(t)$  via a Fourier transformation. The representative  $A_s(t)$  profiles in (a) and relative  $p(B_{\text{loc}})$  in (b)**  
 144 **are measured at  $T = 5$  K for  $E = 3$  keV (red),  $E = 6$  keV (light brown),  $E = 14$  keV (blue) and at  $T = 150$  K for**  
 145  **$E = 3$  keV (black). The  $\lambda$  values extracted from the fits of the  $A_s(t)$  profiles in (a) are used to determine the**  
 146 **corresponding data points in Fig. 2 of the main text, and show that  $\lambda$  is higher at low energy ( $E = 3$  keV;**  
 147 **red curve) compared to high energy ( $E = 14$  keV; blue curve) due to the surface nature of the magnetism**  
 148 **probed in SRO<sub>214</sub>, and also that  $\lambda$  decreases at higher temperature (i.e.,  $E = 3$  keV,  $T = 150$  keV; black**  
 149 **curve), where it becomes comparable to  $\lambda$  at  $E = 6$  keV and  $T = 5$  keV (light brown curve), consistently**  
 150 **with the data in Fig. 2 of the main text. The data in (b) show that the  $p(B_{\text{loc}})$  distributions are monomodal**  
 151 **and that the amplitude values of the average local field  $B_{\text{loc}}$  extracted from the same distributions do not**  
 152 **change significantly as a function of  $E$ , as shown by the expanded view on the same data around the**  
 153 **distribution peaks reported in the inset in (b) and also shown by the data in Fig. 3c of the main text.**  
 154  
 155

156 We note that, for all measurements done at the same  $E$  but at different temperature  $T$  (i.e., for a  $T$ -  
 157 scan at fixed  $E$ ), we can safely assume that  $A_0$  and  $\varphi_0$  are the same, since these parameters are set  
 158 by the muon initial spin polarisation which is  $T$ -independent. To improve the reliability of the fit  
 159 and reduce the number of free parameters, we therefore fit all  $A_s(t, E)$  spectra which are part of the  
 160 same  $T$ -scan to the function given by (Eq. S3) using common (shared) values of  $A_0$  and  $\varphi_0$ , whilst  
 161 allowing  $B_{\text{loc}}$  and  $\lambda$  to vary as a function of  $T$  (since they are related to sample properties). As a



162 result of this fitting procedure, we obtain the  $\lambda$  and  $B_{\text{loc}}$  values used for the  $T$ -scans shown in Fig. 2  
 163 and Fig. 3a, b of the main text. In particular, we note that in Fig. 2 of the manuscript we do not  
 164 report the  $T$ -dependence of  $\lambda$  but the  $T$ -dependence of the shift in the depolarization rate,  $\Delta\lambda(T)$ ,  
 165 determined from the  $\lambda$  value measured at  $T = 270$  K. The reason for our choice to show the  $\Delta\lambda(T)$   
 166 profiles at different  $E$ s in Fig. 2 of the manuscript other than the  $\lambda(T)$  profiles is because the large  
 167 differences in the absolute values of  $\lambda$  at low  $E$  (e.g.,  $E = 3$  keV) compared to the of  $\lambda$  values at  
 168 higher  $E$ s (e.g.,  $E = 6$  keV and 14 keV) do not reflect actual changes in the physical properties of  
 169 the SRO<sub>214</sub> samples, but they are simply due to a variation in the number of backscattered muons.  
 170 The  $\lambda(T)$  profiles measured at different  $E$ s are reported for completeness in Supplementary Fig. 6.  
 171 It is worth noting that the data in Supplementary Fig. 6 show that  $\lambda$  increases by a factor larger  
 172 than 3 at  $E = 3$  keV when  $T$  is decreased from 270 K down to 5 K.  
 173

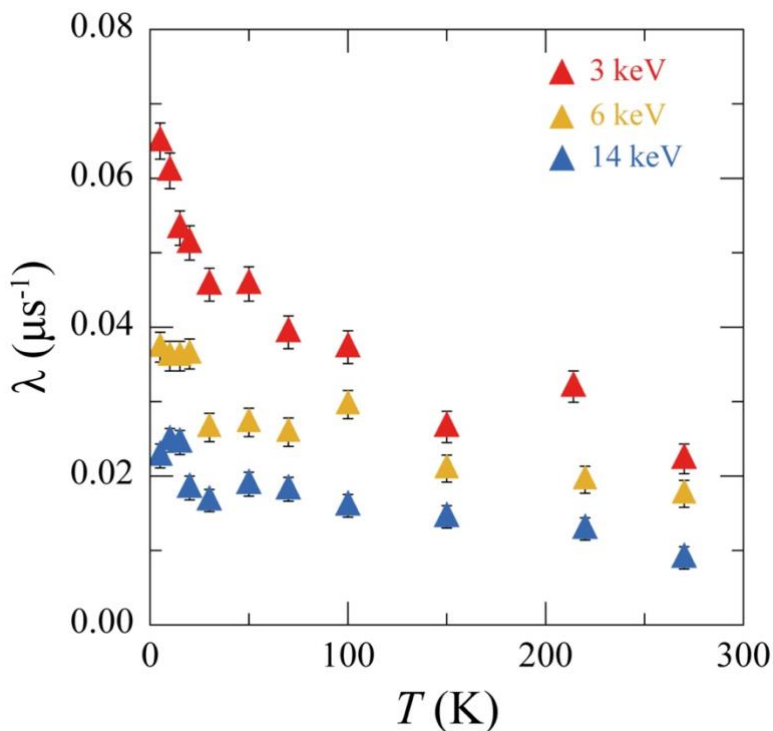

**Supplementary Figure 6:** Temperature dependence of the depolarization rate in SRO<sub>214</sub> at different muons' implantation depths.

Depolarization rate  $\lambda$  as a function of temperature  $T$  measured in a TF setup with an applied external magnetic field amplitude  $B_{\text{ext}} = 100$  Gauss at different implantation energy  $E$  values: 3 keV (red symbols with error bars), 6 keV (orange symbols with error bars) and 14 keV (blue symbols with error bars).

174 For the measurements done at the same  $T$  but with varying  $E$  (i.e., for an  $E$ -scan at a fixed  $T$ ),  
 175 we cannot perform a fit using common  $A_0$  and  $\varphi_0$  to all runs since these parameters are  $E$ -  
 176 dependent. For the  $E$ -scans, which are shown in Fig. 3c, d of the main text for two different  $B_{\text{ext}}$   
 177 values, we fit together pairs of runs which are performed at the same  $E$  and in the same  $B_{\text{ext}}$  but at  
 178 different  $T$  (corresponding to  $T = 5$  K  $< T_{\text{on}}$  and  $T = 100$  K  $> T_{\text{on}}$  for Fig. 3c, d). The pair of  
 179 measurements meeting these conditions are fitted together using  $A_0$  and  $\varphi_0$  as common parameters  
 180 to both runs, and with  $\lambda$  and  $B_{\text{loc}}$  as parameters to fit for each individual run.

181 As explained in the manuscript, from the  $T$ -dependence of  $\Delta\lambda(T)$  profiles obtained in TF, we  
 182 also estimate that  $50$  K  $< T_{\text{on}} < 75$  K. This result, which we infer based on the  $\Delta\lambda(T)$  profiles shown

183 in Fig. 2 of the manuscript, is also evidenced by the data sets in Supplementary Fig. 7, where we  
 184 show the raw asymmetry data and corresponding fits measured at a few representative  
 185 temperatures ( $T = 5$  K, 50 K and 270 K) at three different energies ( $E = 3$  keV, 6 keV and 14 keV).  
 186 In particular, Supplementary Fig. 7a shows that the asymmetry signal at  $E = 3$  keV exhibits a  
 187 significant increase in muons' depolarization from the value measured at 270 K (black curve)  
 188 already for  $T = 50$  K (light blue curve), as evidenced by the fact that the asymmetry curve at  $T =$   
 189 50 K already deviates at a time  $t \sim 1.5$   $\mu$ s from the asymmetry profile at  $T = 270$  K. This is in  
 190 contrast with the data reported in Supplementary Fig. 7b, c (showing the data for  $E = 6$  keV and  
 191 14 keV) where a very small separation between the asymmetry curves at  $T = 50$  K and  $T = 270$  K  
 192 only becomes visible for a relaxation time larger than 4  $\mu$ s.

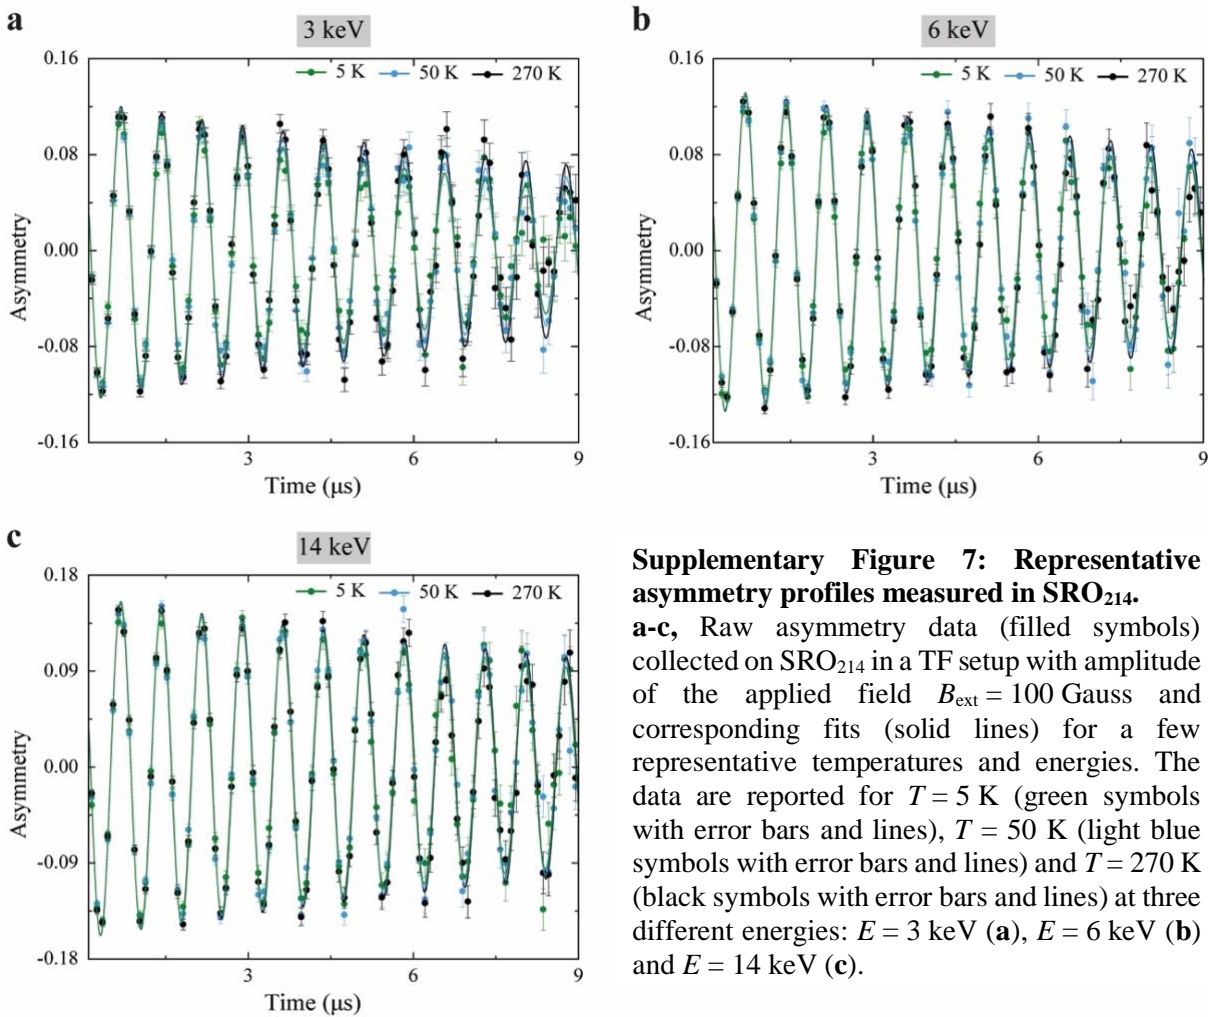

**Supplementary Figure 7: Representative asymmetry profiles measured in SRO<sub>214</sub>.**  
**a-c**, Raw asymmetry data (filled symbols) collected on SRO<sub>214</sub> in a TF setup with amplitude of the applied field  $B_{\text{ext}} = 100$  Gauss and corresponding fits (solid lines) for a few representative temperatures and energies. The data are reported for  $T = 5$  K (green symbols with error bars and lines),  $T = 50$  K (light blue symbols with error bars and lines) and  $T = 270$  K (black symbols with error bars and lines) at three different energies:  $E = 3$  keV (**a**),  $E = 6$  keV (**b**) and  $E = 14$  keV (**c**).

193  
 194

195 The raw asymmetry data therefore suggest, consistently with the  $\Delta\lambda$  values extracted from these  
 196 asymmetry curves and reported for more  $T$  values in Fig. 2 of the manuscript, that closer to the  
 197 SRO<sub>214</sub> surface at  $E = 3$  keV, the magnetism – which is associated with an increase in the slope of  
 198  $\Delta\lambda$  – sets in at  $50$  K  $< T_{\text{on}} < 75$  K.

199



## 200 **Analysis of longitudinal field (LF) and zero field (ZF) measurements**

201 In the LF and ZF measurements,  $\mathbf{B}_{\text{ext}}$  is applied along the same direction (i.e., parallel or  
202 antiparallel) as the initial muon spin polarization  $\mathbf{S}_{\mu^+}(0)$ , with the result that the muons do not  
203 precess in the plane perpendicular to  $\mathbf{B}_{\text{ext}}$  in contrast to the TF configuration. Therefore, the  
204  $A_s(t, E)$  signal has no oscillatory component, and it depends on the processes of spin lattice  
205 relaxation and depolarization.

206 At a fixed  $T$  and  $E$ , we perform two ZF/LF measurements, one with the initial muon spin  
207 polarization along the  $+z$  and the other along  $-z$  (see Fig. 1c of the main text). This approach  
208 allows us to increase the signal-to-noise ratio and to avoid systematic errors in the measurements  
209 due to changes in the beam optics as result of the muon's spin rotation.

210 The LF/ZF measurements asymmetry data are then fitted with the theoretical function expected  
211 for a Lorentzian static field distribution in ZF and LF (i.e., fit to a static exponential/Lorentzian  
212 Kubo-Toyabe function in ZF and LF; ref. <sup>23</sup> of the main text), assuming that the local static fields  
213 do not change. In this fit, there is only one free physical parameter which is the Lorentzian field  
214 distribution width, meaning that the field dependence (decoupling) is determined by the theoretical  
215 function for the corresponding applied field. The fit gives a value of the half width at half  
216 maximum (HWHM) of the field distribution of  $\sim 0.5$  Gauss which is consistent with the value that  
217 we estimate in the original manuscript for the local static fields probed by muons near the surface  
218 of SRO<sub>214</sub>.

## 219 **Numerical model for orbital loop current phase in SRO<sub>214</sub>**

220 To explain the magnetism measured at the surface of SRO<sub>214</sub> by low-energy muon spin rotation  
221 (LE- $\mu$ SR), we consider an orbital loop current phase emerging at the surface of SRO<sub>214</sub>. Our  
222 theoretical analysis shows that an orbital loop current phase can indeed account for the features of  
223 the unconventional magnetism observed (i.e., low magnetic moment of  $< 0.01 \mu_B/\text{Ru}$  atom, high  
224  $T_{\text{onset}}$ ,  $50 \text{ K} < T_{\text{on}} < 75 \text{ K}$ ), whilst being compatible with the translational symmetry of the crystal  
225 and with a homogeneous distribution of the magnetism sources over a length scale comparable  
226 with the size of a SRO<sub>214</sub> unit cell.

227 On the basis of symmetry arguments, we focus on those orbital loop current phases  
228 (Supplementary Fig. 8a) that are consistent with the inversion symmetry breaking occurring at the  
229 SRO<sub>214</sub> surface. This consideration leads us to exclude loop current phases of type  $\Theta_{\text{I}}$ , which are  
230 made of spontaneous currents flowing on each bond of the RuO<sub>4</sub> plaquette inside the  $ab$ -plane of  
231 a RuO<sub>6</sub> octahedron (Supplementary Fig. 8b). We therefore focus on those loop currents of the type  
232  $\Theta_{\text{II}}$  which break inversion symmetry and are asymmetric because they consist of clockwise and

233 anticlockwise loop currents flowing only within selected areas of the RuO<sub>4</sub> plaquette, as illustrated  
 234 in Supplementary Fig. 8c.

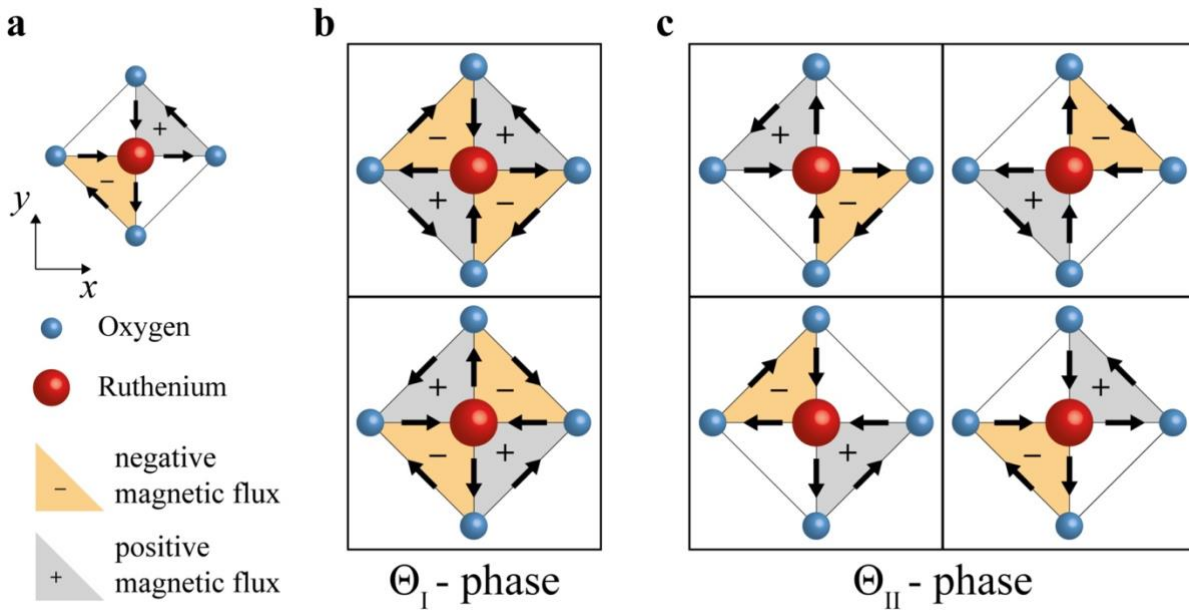

235  
 236 **Supplementary Figure 8: Loop current phases.** **a**, Illustration of the RuO<sub>4</sub> plaquette with example of  
 237 orbital loop currents and magnetic fluxes generated. Loop currents flowing clockwise (anticlockwise)  
 238 generate magnetic flux point inward (outward) the RuO<sub>4</sub> plane and they are labelled with an orange (grey)  
 239 triangle with a '-' ('+') sign in the middle. **b**, **c**, Possible configuration of orbital loop current distributions  
 240 with corresponding magnetic fluxes for a single RuO<sub>4</sub> plaquette of the type  $\Theta_I$  (**b**) and of type  $\Theta_{II}$  (**c**). Four  
 241 RuO<sub>4</sub> plaquettes of either type  $\Theta_I$  or of type  $\Theta_{II}$  combine, along with a structural rotation, to give the total  
 242 orbital current distribution for the SRO<sub>214</sub> supercell as shown in Fig. 5c of the main text. Orbital loop current  
 243 phases of type  $\Theta_I$  are characterized by magnetic fluxes alternating in sign within the four triangles of the  
 244 RuO<sub>4</sub> plaquette, and they break the C<sub>4</sub> transformation symmetry and time reversal symmetry, but they  
 245 preserve inversion symmetry (e.g., the state is preserved after a rotation of  $\pi/2$  about the centre followed  
 246 by a reversal of the sign of the flux). These symmetry properties, however, make the type  $\Theta_I$  phase not  
 247 compatible with the inversion symmetry breaking expected on the SRO<sub>214</sub> surface.  
 248

249 Given the reconstruction of the RuO<sub>6</sub> octahedra occurring in SRO<sub>214</sub> near its surface, we restrict  
 250 our analysis to those states combining, within a given SRO<sub>214</sub> supercell, a loop current of the type  
 251  $\Theta_{II}$  for each RuO<sub>4</sub> plaquette with the rotation of the same plaquette (see Fig. 5c of the main text).  
 252 Within this configuration, we only consider states associated with staggered orbital fluxes. This is  
 253 because states associated instead with a spontaneous flow of currents or with charge accumulation  
 254 would not be physically compatible with the metallic state of SRO<sub>214</sub>.

255 We adopt a microscopic description of the orbital loop current states having the features  
 256 described above. Our microscopic model includes *d*-orbitals (*t<sub>g</sub>* orbitals) at Ru site and *p*-orbitals  
 257 at planar O sites. We adopt a tight-binding description of the electronic configuration that includes  
 258 Coulomb interactions both between the electron densities on Ru and O atoms and between  
 259 electrons in the *p*-states on neighbouring O sites. The *d-p* and *p-p* Coulomb interactions are  
 260 responsible for the electronic instabilities leading to the formation of the loop current phase. Our  
 261 model includes the canonical *L · s* atomic spin-orbit coupling between the effective *L* = 1 angular

262 momentum representation for the  $t_{2g}$  sector of the  $d$ -orbitals and the  $s = 1/2$  electron spin at the Ru  
 263 site. The spin-orbit coupling interaction and its strength depend on the crystal field potential  
 264 associated with the octahedral distortions (i.e., both flattening and rotations of the RuO<sub>6</sub>  
 265 octahedra).

266 For the calculations, we adopt electronic parameters derived from ab-initio calculations  
 267 (refs. <sup>35,45</sup> of the main text). The values that we use for the non-vanishing nearest neighbour  
 268 hopping parameters  $t$  and the on-site orbital dependent energies  $\varepsilon$  are summarized in the  
 269 Supplementary Table 1 below.  
 270

| $t_{d_{xy}-p_y}$ | $t_{d_{xz}-p_z}$ | $t_{p_x-p_y}$ | $t_{p_z-p_z}$ | $\varepsilon_{d_{xy}}$ | $(\varepsilon_{d_{xz}}, \varepsilon_{d_{yz}})$ | $\varepsilon_{p_x}$ | $\varepsilon_{p_y}$ | $\varepsilon_{p_z}$ |
|------------------|------------------|---------------|---------------|------------------------|------------------------------------------------|---------------------|---------------------|---------------------|
| 1.28 eV          | 1.28 eV          | 0.39 eV       | 0.15 eV       | -2.34 eV               | -2.36 eV                                       | -4.62 eV            | -4.52 eV            | -4.51 eV            |

271 **Supplementary Table 1: List of model parameters.** Nearest neighbour hopping parameter amplitudes  $t$   
 272 for several pairs of orbitals and on-site orbital energies  $\varepsilon$  (orbitals are indicated as subindexes).  
 273

274 We write the model Hamiltonian in a compact form by introducing a basis vector for the unit  
 275 cell that includes two inequivalent Ru atoms and four O atoms. Supplementary Fig. 9 shows the  
 276 hybridization processes between  $p$ - and  $d$ - orbitals along with their signs defined by the orbitals'  
 277 spatial symmetries. We identify two different possible electronic phases, here denoted as LC<sup>+</sup> and  
 278 LC<sup>-</sup> phase, which break time reversal symmetry due to the formation of orbital loop currents. The  
 279 two phases differ in their orbital contributions, namely for the loop current distributions of the  $d_{xy}$   
 280 and  $(d_{xz}, d_{yz})$  sectors, which are additive for the LC<sup>+</sup> state and cancelling for the LC<sup>-</sup> state (see  
 281 Fig. 5b, c of the main text).

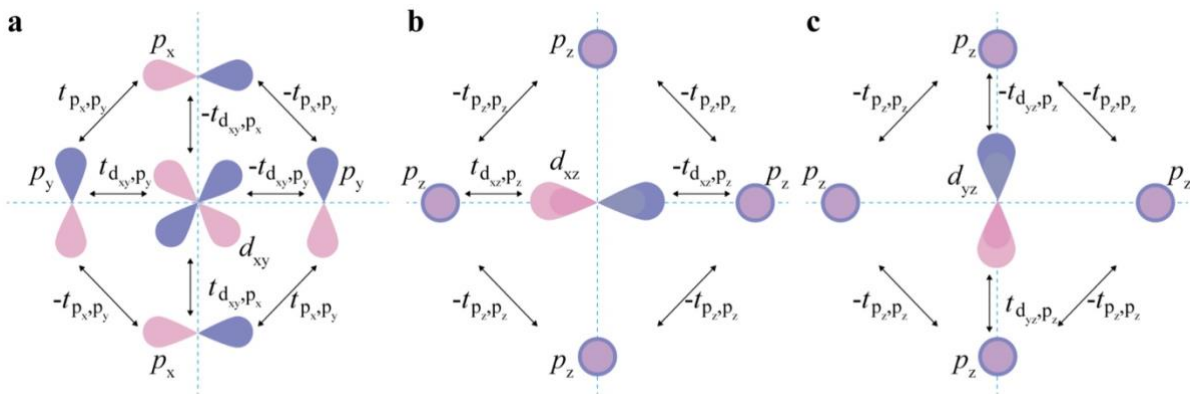

282 **Supplementary Figure 9: Ru-O hybridization processes in SRO<sub>214</sub>.** a-c, Illustration of the Ru-O  
 283 hybridization processes in SRO<sub>214</sub> for the  $d_{xy}$  (a),  $d_{xz}$  (b) and  $d_{yz}$  (c) orbitals with corresponding hopping  
 284 parameters  $t$ .  
 285  
 286

### 287 Determination of the ground state

288 In addition to investigating which is the most energetically favourable configuration between the  
 289 LC<sup>-</sup> and LC<sup>+</sup> state, we also study whether any loop current phases with non-zero magnetic fluxes  
 290 have a lower free energy minimum compared to the conventional normal metal phase of SRO<sub>214</sub>  
 291 with zero magnetic fluxes.

292 To determine whether the LC<sup>-</sup> and LC<sup>+</sup> phase represents the most energetically favourable state  
 293 (i.e., the ground state) of the SRO<sub>214</sub> system, we decouple the inter-site Coulomb interaction in  
 294 terms of the asymmetric bonding operator  $\hat{\phi}_{lm}^{\alpha\beta} = i(c_{l,\alpha}^\dagger c_{m,\beta} - c_{m,\beta}^\dagger c_{l,\alpha})$  for the l-m bond between  
 295 the atoms with positions identified by the coordinates  $a_l$  and  $a_m$  within the SRO<sub>214</sub> unit cell. Here,  
 296  $c_{l,\alpha}$  ( $c_{l,\alpha}^\dagger$ ) are the annihilation (creation) operators for an electronic state with  $\alpha$  orbital at the atomic  
 297 site with coordinate  $a_l$ . The annihilation and creation operators  $c_{m,\beta}$  and  $c_{m,\beta}^\dagger$  are similarly defined  
 298 for the electronic state associated with the  $\beta$  orbital at the atomic site with coordinate  $a_m$ .

299 The inter-site Coulomb interaction for a generic l-m bond ( $U_{lm}$ ) fulfils the relation

$$300 \quad U_{lm} n_{l,\alpha} n_{m,\beta} = - \left(\frac{1}{2}\right) U_{lm} \left(\hat{\phi}_{lm}^{\alpha\beta}\right)^\dagger \hat{\phi}_{lm}^{\alpha\beta} + \left(\frac{1}{2}\right) U_{lm} (n_{l,\alpha} + n_{m,\beta}), \quad (\text{Eq. S4})$$

301  
 302 where  $n_{l,\alpha} = c_{l,\alpha}^\dagger c_{l,\alpha}$  and  $n_{m,\beta} = c_{m,\beta}^\dagger c_{m,\beta}$ . By decoupling the interacting part of the quartic term,  
 303 we introduce an order parameter  $\phi$  associated with the expectation value of  $\hat{\phi}_{lm}^{\alpha\beta}$  and rewrite the  
 304 interaction as

$$305 \quad U_{lm} n_{l,\alpha} n_{m,\beta} \cong - \left(\frac{1}{2}\right) U_{lm} \left[ \left( \langle \hat{\phi}_{lm}^{\alpha\beta} \rangle \left( \hat{\phi}_{lm}^{\alpha\beta} \right)^\dagger + h.c. \right) - \left| \langle \hat{\phi}_{lm}^{\alpha\beta} \rangle \right|^2 \right] + \left(\frac{1}{2}\right) U_{lm} (n_{l,\alpha} + n_{m,\beta}) \quad (\text{Eq. S5})$$

306  
 307 in which the term linear in density leads to a renormalization of the chemical potential. The  
 308 average value  $\langle \hat{\phi}_{lm}^{\alpha\beta} \rangle$  is evaluated by taking into account the contributions of all the Bloch states  
 309 weighted by the corresponding Fermi distribution factor. In our analysis, to directly compare the  
 310 free energies of the LC<sup>-</sup> and LC<sup>+</sup> phase we assume that  $\langle \hat{\phi}_{lm}^{\alpha\beta} \rangle = \pm\phi$ , where the positive or  
 311 negative sign is taken according to the sense of circulation of the orbital loop currents shown in  
 312 Fig. 5c of the main text.

313 We calculate the phase stability of the LC<sup>+</sup> and LC<sup>-</sup> configurations by determining the minimum  
 314 of the free energy  $E(\phi)$  with respect to the free energy of the normal state  $E(0)$  as a function of  
 315 the order parameter  $\phi$ , which is associated with the amplitudes  $\langle \hat{\phi}_{lm}^{\alpha\beta} \rangle$  within the SRO<sub>214</sub> unit  
 316 cell. The results of the free energy calculation in Fig. 5d of the main text show that the free energy  
 317 of the LC<sup>+</sup> and LC<sup>-</sup> states  $E(\phi)$  can be lower than  $E(0)$  if  $U$  is sufficiently large. This result implies  
 318 that, above a certain threshold of the inter-site Coulomb interaction  $U$ , the LC<sup>+</sup> and LC<sup>-</sup> phases  
 319 indeed represent the ground state of the SRO<sub>214</sub> system and they are therefore more energetically  
 320 favoured compared to the normal state with no magnetic fluxes. Fig. 5d of the main text also shows

321 that the  $LC^-$  phase is more stable than the  $LC^+$  phase, meaning the most stable orbital loop current  
 322 phase consists of oppositely circulating currents that generate opposite magnetic fluxes in the  $xy$ -  
 323 and  $z$ - orbital sectors. Iterative self-consistent calculations give variations of the amplitude of the  
 324 loop current on each bond, which do not affect the quality of the final result, namely that the  $LC^-$   
 325 phase is the most energetically favoured.

326

### 327 **Magnetic field generated by the orbital loop current phase**

328 We calculate the magnetic field generated by the most stable orbital loop current phase  $LC^-$  and  
 329 compare its magnitude with that measured experimentally by low-energy muons.

330 After determining  $\langle \hat{\phi}_{lm}^{\alpha\beta} \rangle$ , we compute the expectation value of the current operator on a given  
 331  $l - m$  bond defined as  $\langle \hat{j}_{lm}^{\alpha\beta} \rangle = \left(\frac{e}{\hbar}\right) f_{lm}^{\alpha\beta} \langle \hat{\phi}_{lm}^{\alpha\beta} \rangle$ , where  $\hbar$  is the reduced Planck constant,  $e$   
 332 is the elementary charge, and  $f_{lm}^{\alpha\beta}$  is the effective energy associated with charge processes between  
 333  $\alpha$  and  $\beta$  orbitals including both hopping and the symmetry breaking contributions arising from  
 334 Coulomb interactions. We then determine the magnetic field generated by the average current  
 335  $\langle \hat{j}_{lm}^{\alpha\beta} \rangle$  by using the Biot-Savart law, whilst taking into account the orbital dependent directions  
 336 of the loop currents. For this calculation, we assume distances between Ru and O atoms of  
 337  $d_{Ru-O} \cong 1.9 \text{ \AA}$  and  $d_{O_x-O_y} \cong 2.7 \text{ \AA}$  (ref. <sup>24</sup> of the main text) and use the  $d$ - $p$  and  $p$ - $p$  hopping  
 338 parameter amplitudes for the orbital dependent hybridization processes reported in Supplementary  
 339 Table 1.

340 As indicated above, we restrict our analysis to the magnetic field generated by the orbital currents  
 341 of the  $LC^-$  phase, since this is the ground state of the system. Consistently with the definition of  
 342 the  $LC^-$  state, we determine the magnetic field assuming that the orbital currents in each Ru- $O_x$ -  
 343  $O_y$  plaquette have opposite circulation directions. We note that, in this configuration, the loop  
 344 currents flowing along the Ru- $O_x$  and Ru- $O_y$  bonds have a comparable effective kinetic energy  
 345  $f_{lm}^{\alpha\beta}$  and amplitude of  $\langle \hat{\phi}_{lm}^{\alpha\beta} \rangle$  for the contributions associated with either the  $d_{xy}$  or the ( $d_{xz}$ ,  $d_{yz}$ )  
 346 orbitals, but opposite in sign so that the corresponding  $\langle \hat{j}_{lm}^{\alpha\beta} \rangle$  terms tend to cancel out. The only  
 347 orbital currents that do not cancel out are those flowing along the  $O_x$ - $O_y$  bonds due to inequivalent  
 348 hybridization processes for the  $p$ -orbitals. The resulting magnetic field generated by these  
 349 unbalanced orbital currents is vanishingly small at the centre of a  $RuO_4$  plaquette.

350 Since  $\langle \hat{\phi}_{lm}^{\alpha\beta} \rangle \sim 10^{-1}$  for the minimum of the free energy of the  $LC^-$  state as the data in Fig. 5d  
 351 of the main text show, and using  $\mu_m \cong 2 \cdot \text{Gauss m Ampere}^{-1}$  for the  $SRO_{214}$  magnetic  
 352 permeability  $\mu_m$  (ref. <sup>10</sup> of the main text) and the  $t_{p_x-p_y}$  and  $t_{p_z-p_z}$  hopping parameter values

353 reported in Supplementary Table 1, we obtain an estimate of the magnetic field  $B$  generated by  
 354 the orbital loop currents in the  $LC^-$  state within the range from 5 to 15 Gauss. The estimate of  $B$  is  
 355 obtained under the assumption that the muons are implanted closer to an O atom (due to its higher  
 356 electron affinity compared to Ru), which is at an average distance of  $\sim 2\text{\AA}$  in  $SRO_{214}$  from the  
 357 closest Ru (ref. <sup>24</sup> of the main text). The value we estimate for  $B$  is in agreement with the field  
 358 strength determined from the experimental data in Fig. 4 of the main text of  $\sim 10$  Gauss. We also  
 359 note that the magnetic field generated by these loop currents can further decrease when  
 360 approaching a critical value of  $U$  for which the net sum of the  $\langle \hat{\phi}_{lm}^{\alpha\beta} \rangle$  contributions to the order  
 361 parameter  $\phi$  vanishes. The values of  $U$  for which  $\phi$  vanish are calculated based on our model for  
 362 both the  $LC^-$  and  $LC^+$  states and shown in Supplementary Fig. 10.

363 The results in Supplementary Fig. 10 also indicate that, apart from a region very close to the  
 364 critical  $U$  value, the order of magnitude of the induced magnetic field does not vary much as a  
 365 function of  $U$ .

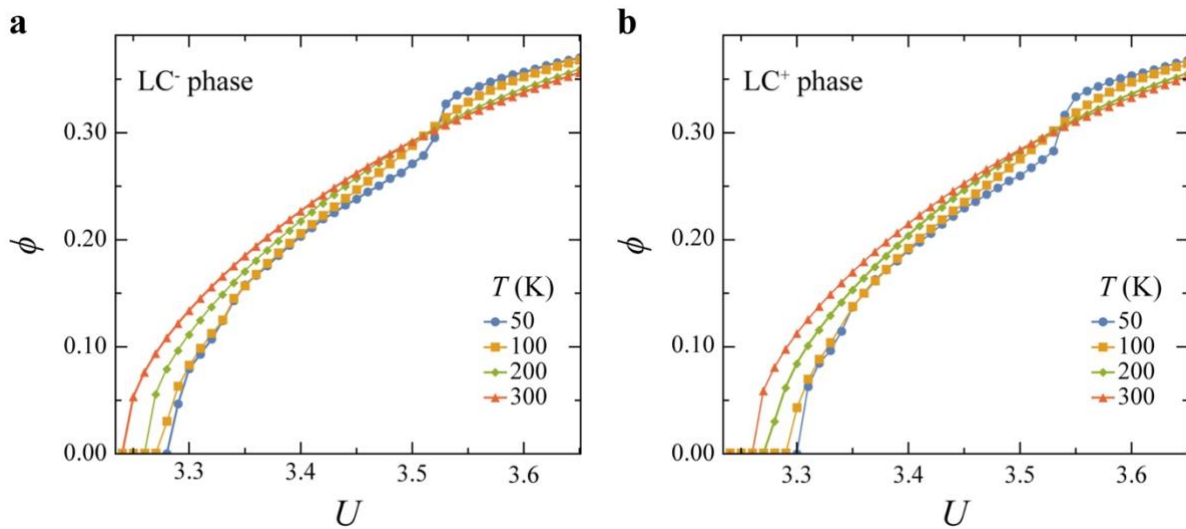

366 **Supplementary Figure 10: Dependence of order parameter on the Coulomb repulsion. a, b,** Evolution  
 367 of the order parameter  $\phi$  as a function of the Coulomb potential  $U$  for the  $LC^-$  (a) and  $LC^+$  (b) states at  
 368 different temperatures (indicated in the figures legends).  
 369  
 370
